# Supplementary material for: Modulating luminescence through anion variation in lead-free Cs2NaInX6 (X = Cl, Br, and I) perovskites: a first-principles study
Source: Royal Society of Chemistry journal article supplement (doi:10.1039/d3nr06373a), 2024-01-01
Supplement: d3nr06373a1.pdf [file d3nr06373a1.pdf]

**Supplementary Information for:**  
**Modulating Luminescence through Anion Variation in Lead-free Cs<sub>2</sub>NaInX<sub>6</sub> (X=Cl, Br, and I) Perovskites: A First-principles Study**

*Desheng Yin,<sup>#a</sup> Zhenren Gao,<sup>#\*ab</sup> Changfu Xu,<sup>a</sup> Pengbo Lyu,<sup>\*a</sup> and Lihong Sun<sup>\*a</sup>*

<sup>a</sup> Hunan Provincial Key Laboratory of Thin Film Materials and Devices, School of Materials Science and Engineering, Xiangtan University, Xiangtan 411105, People's Republic of China.

<sup>b</sup> Hunan Provincial Key Laboratory of Micro-nano Energy Materials and Application Technologies, College of Physics and Electronic Engineering, Hengyang Normal University, Hengyang 421002, People's Republic of China.

<sup>#</sup> Z. Gao and D. Yin contributed equally to this work.

E-mail: zrgao@hynu.edu.cn (Z. Gao); pengbo.lyu@xtu.edu.cn (P. Lyu); lzsun@xtu.edu.cn (L. Sun)

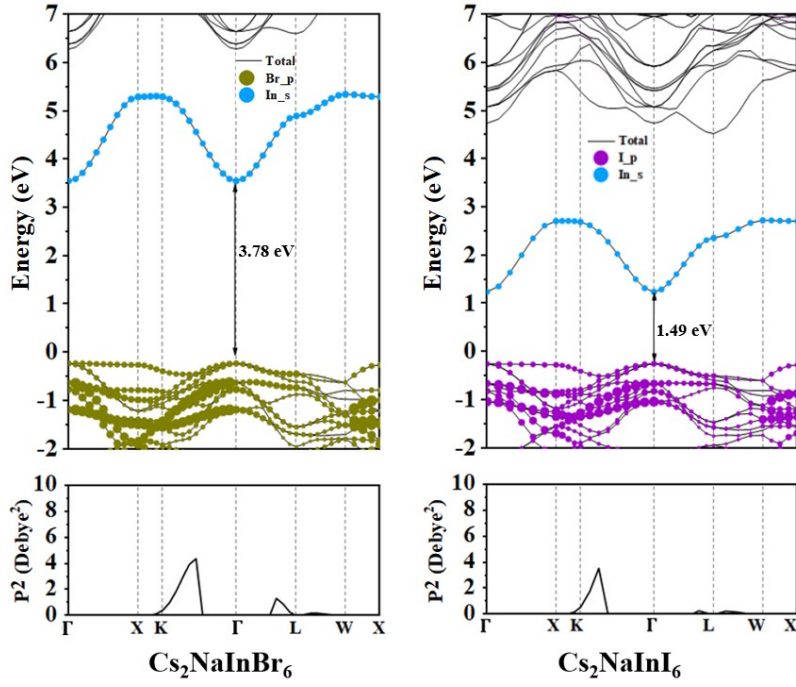

Figure S1. The projected band structures and transition dipole moments of  $\text{Cs}_2\text{NaInBr}_6$  and  $\text{Cs}_2\text{NaInI}_6$  calculated by HSE06 functional.

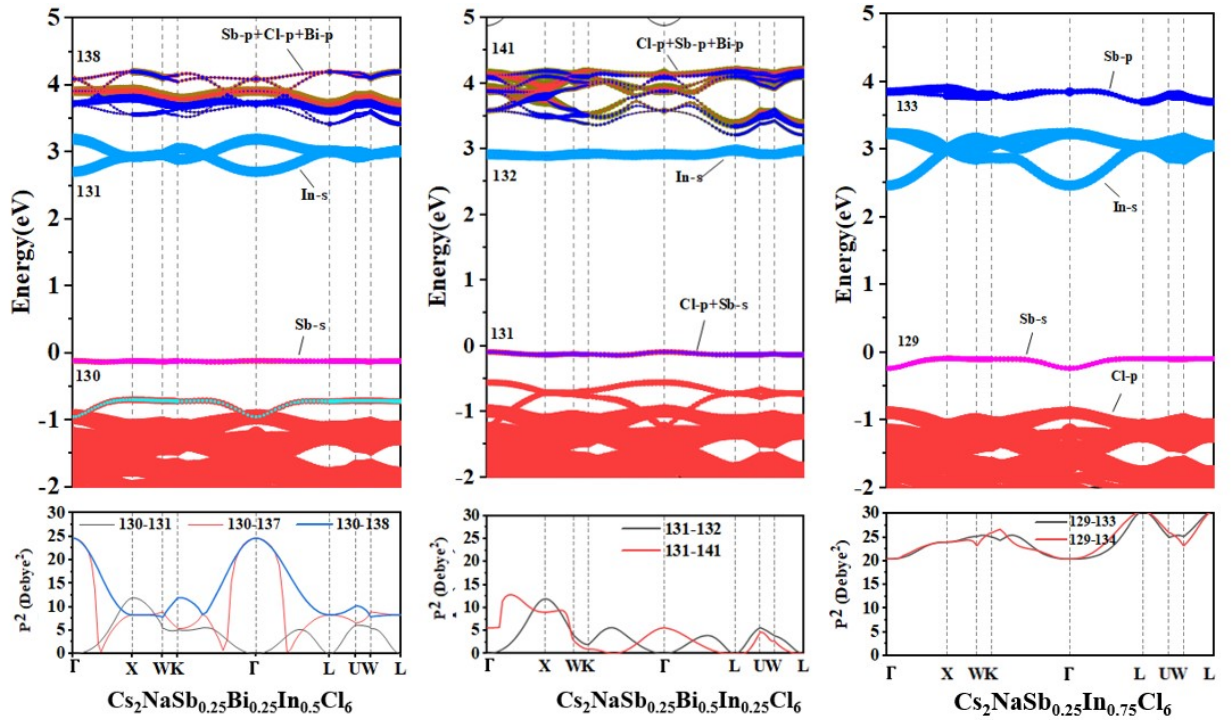

Figure S2. The projected band structures and transition dipole moments of  $\text{Cs}_2\text{NaSb}_{0.25}\text{In}_{0.75}\text{Cl}_6$  and  $\text{Cs}_2\text{NaSb}_{0.25}\text{Bi}_{0.5}\text{In}_{0.25}\text{Cl}_6$ ,  $\text{Cs}_2\text{NaSb}_{0.25}\text{Bi}_{0.25}\text{In}_{0.5}\text{Cl}_6$ .

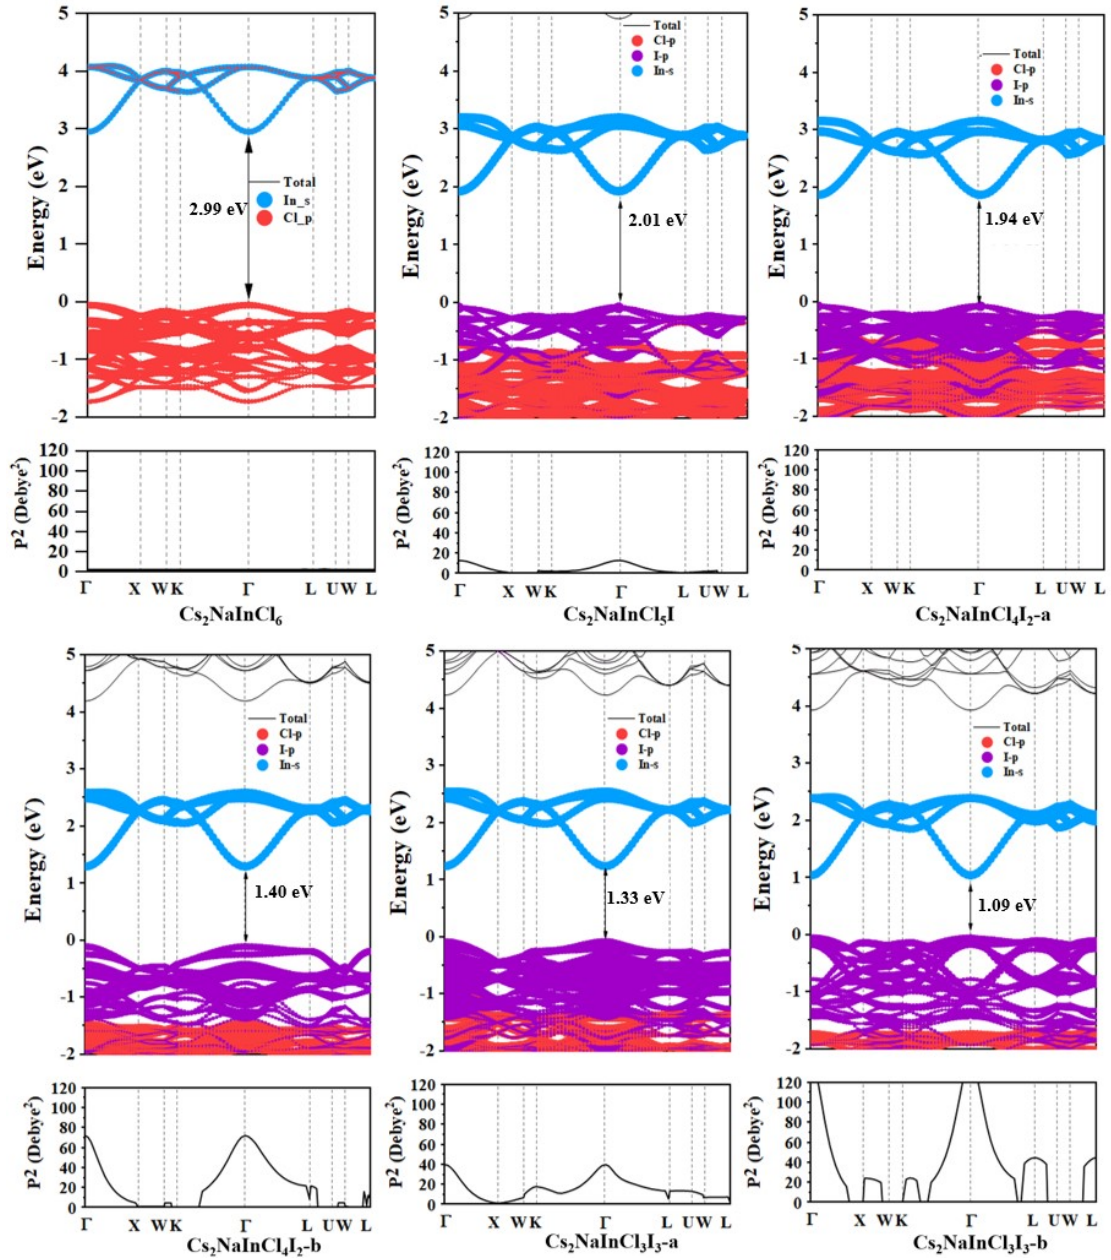

**Figure S3.** The detailed projected band structures and transition dipole moments of  $\text{Cs}_2\text{NaInCl}_6$  and corresponding substituted structures (I substitution) calculated by PBE functional.

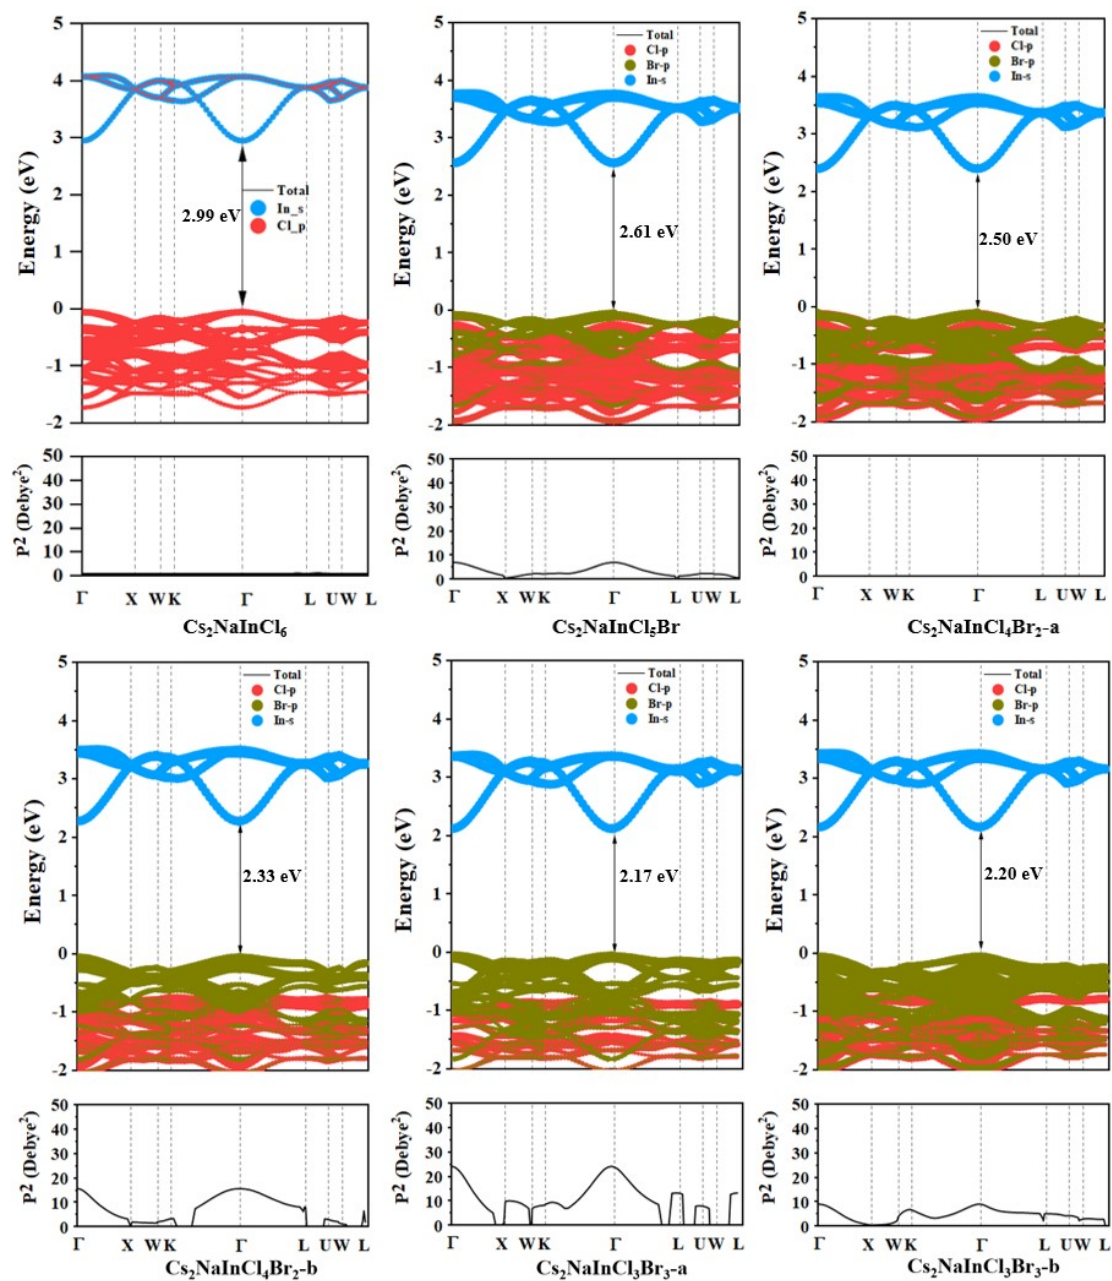

**Figure S4.** The detailed projected band structures and transition dipole moments of Cs<sub>2</sub>NaInCl<sub>6</sub> and corresponding substituted structures (Br substitution) calculated by PBE functional.

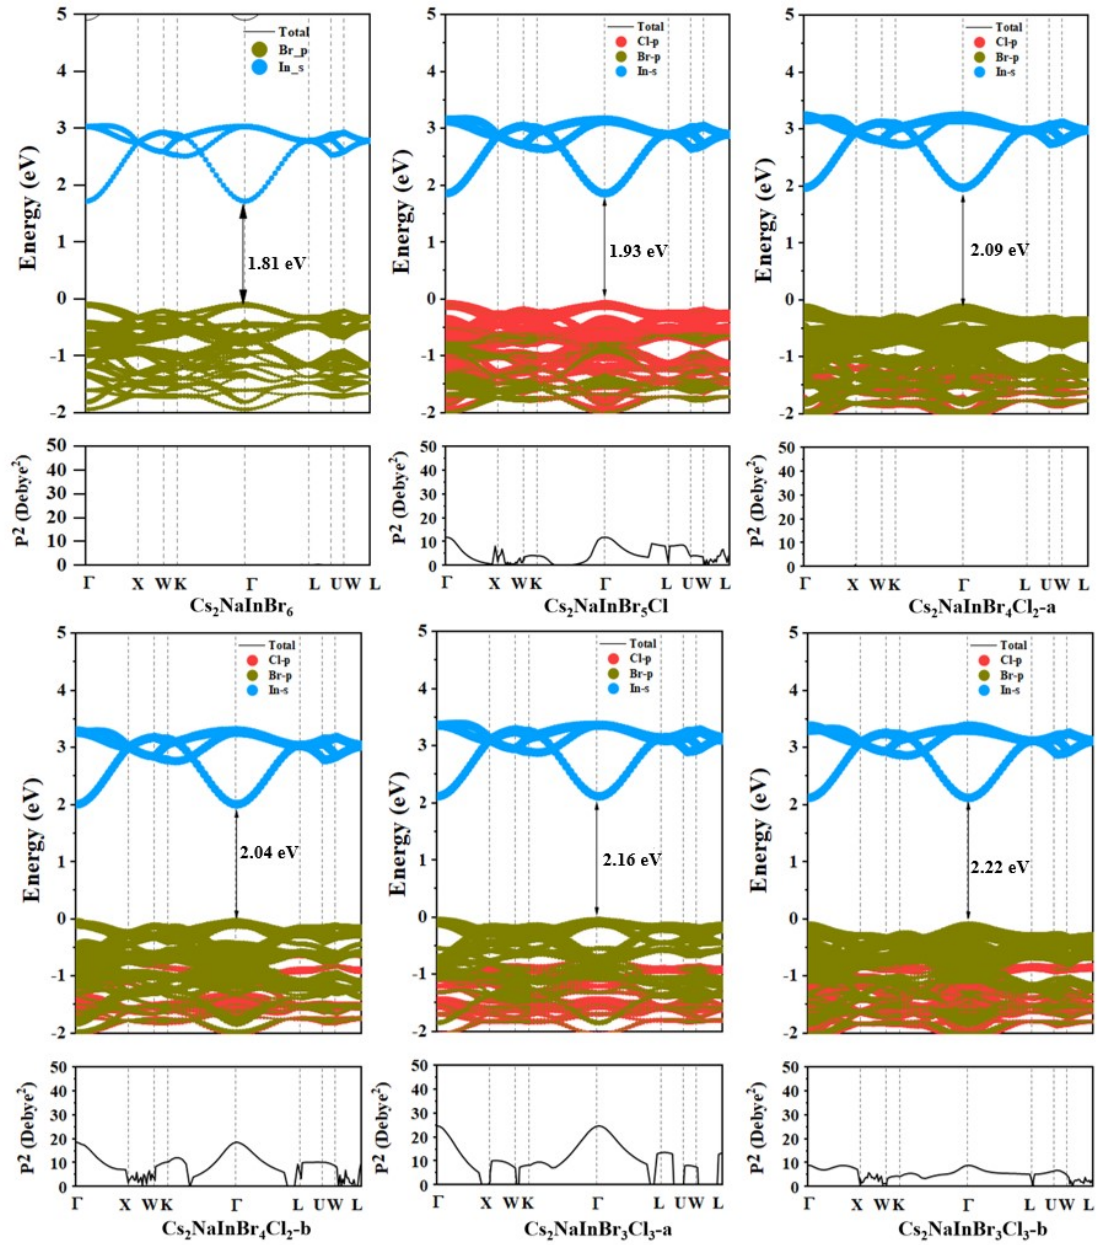

**Figure S5.** The detailed projected band structures and transition dipole moments of  $\text{Cs}_2\text{NaInBr}_6$  and corresponding substituted structures (Cl substitution) calculated by PBE functional.

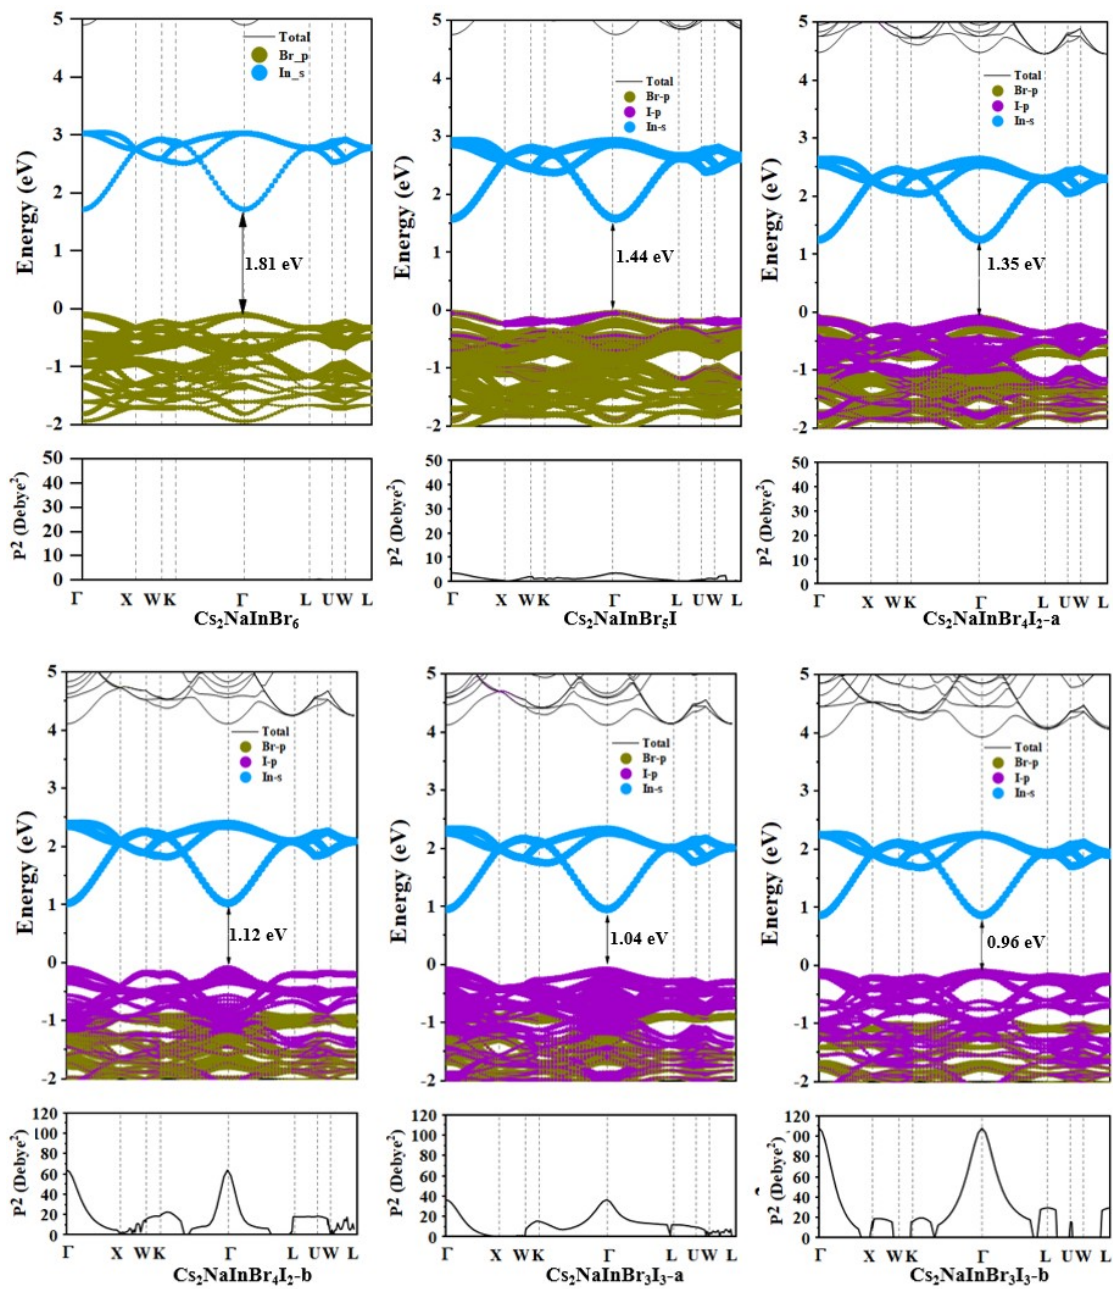

**Figure S6.** The detailed projected band structures and transition dipole moments of  $\text{Cs}_2\text{NaInBr}_6$  and corresponding substituted structures (I substitution) calculated by PBE functional.

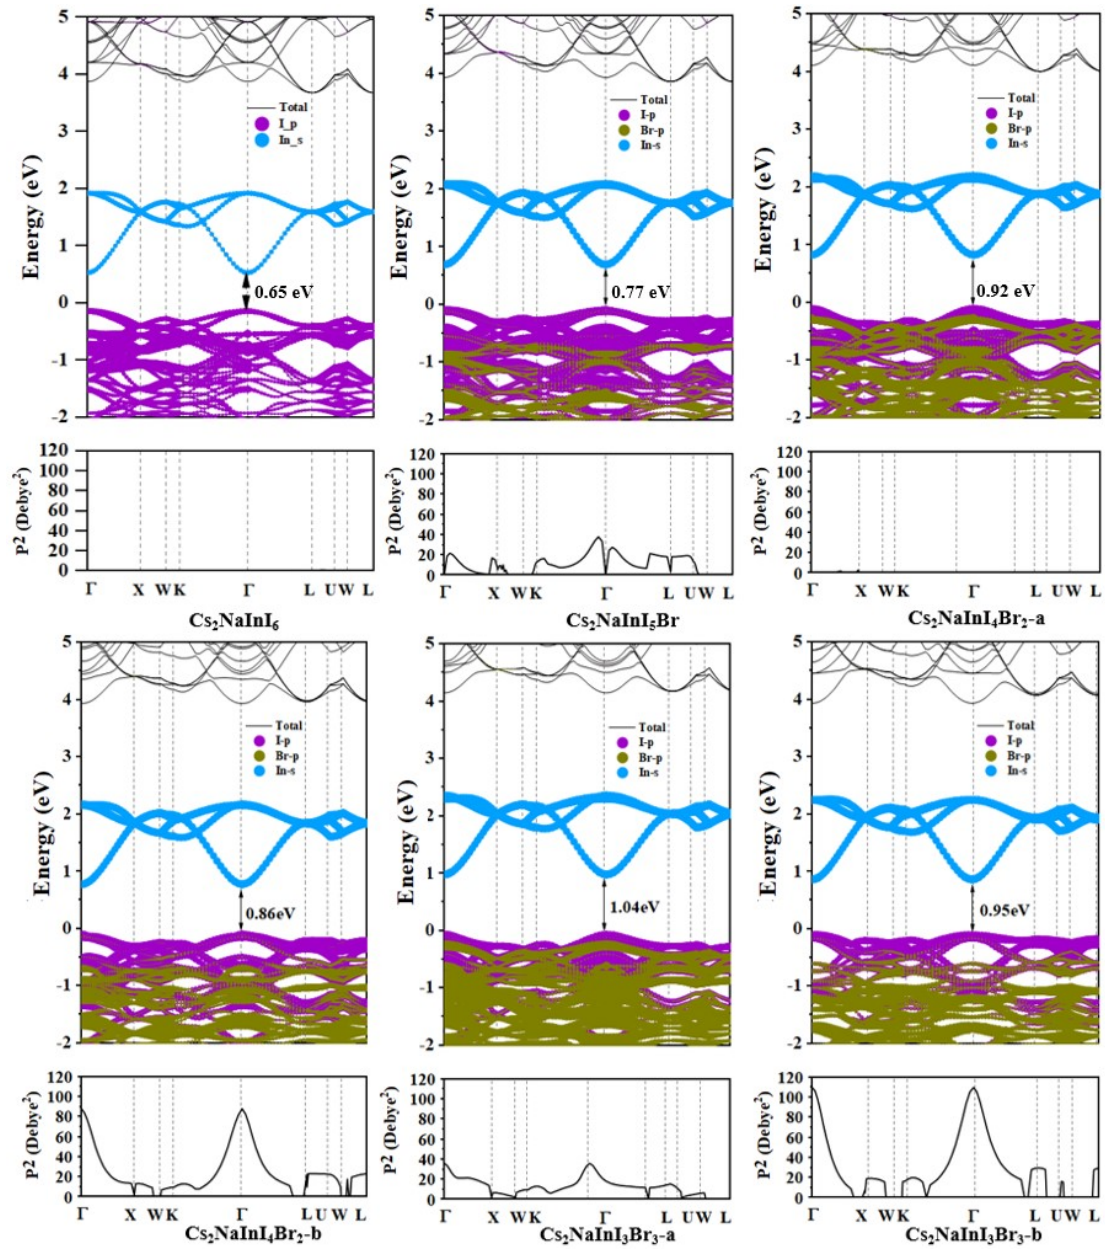

**Figure S7.** The detailed projected band structures and transition dipole moments of  $\text{Cs}_2\text{NaInI}_6$  and corresponding substituted structures (Br substitution) calculated by PBE functional.

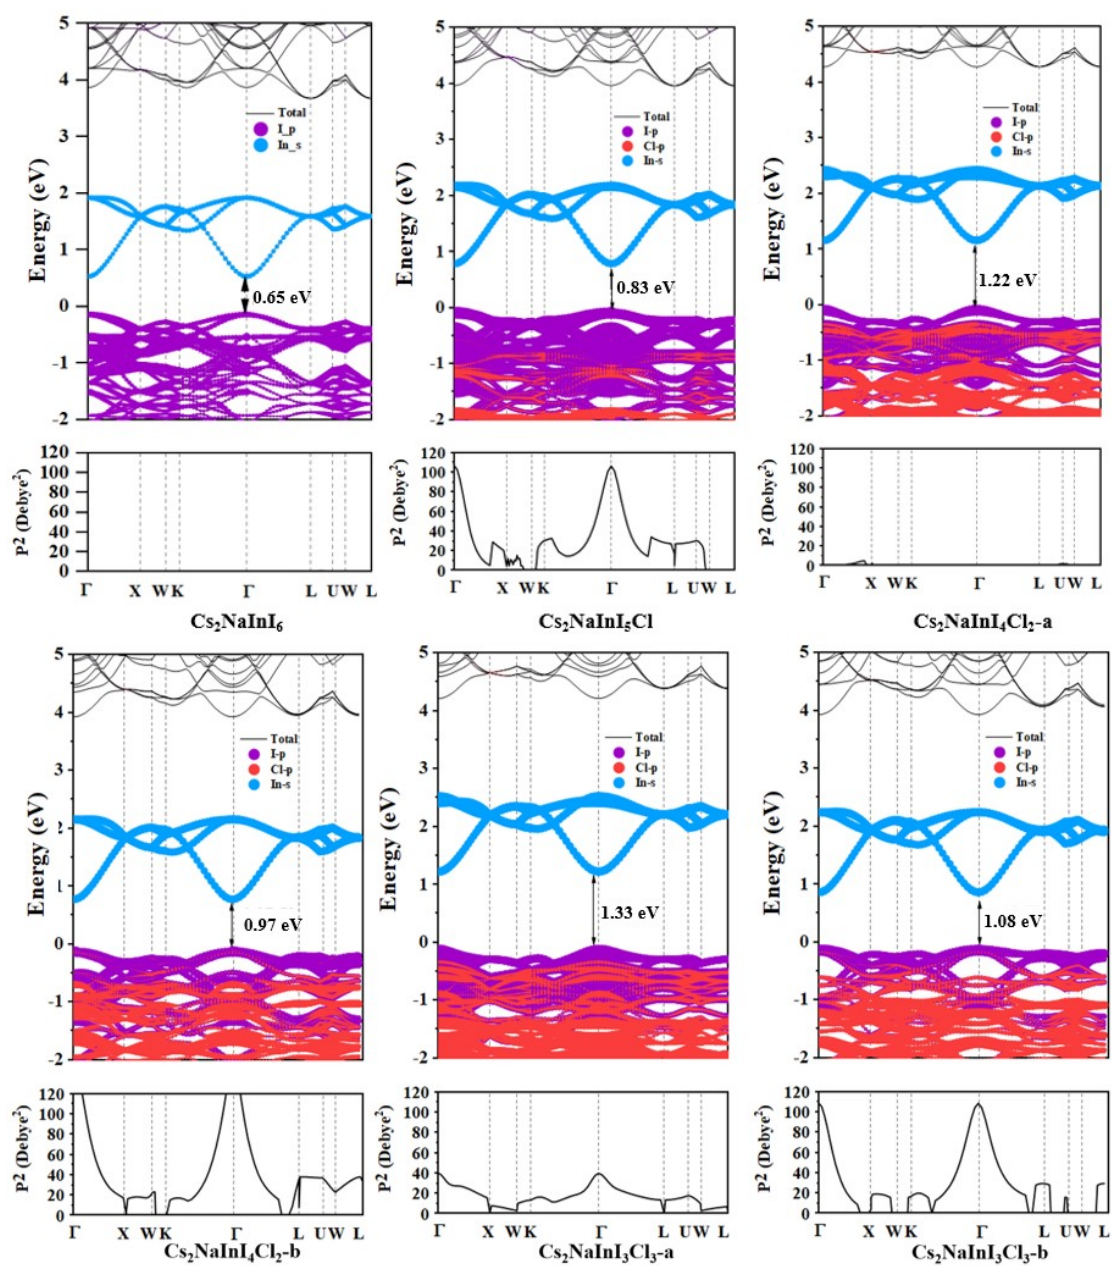

**Figure S8.** The detailed projected band structures and transition dipole moments of  $\text{Cs}_2\text{NaInI}_6$  and corresponding substituted structures (Cl1 substitution) calculated by PBE functional.



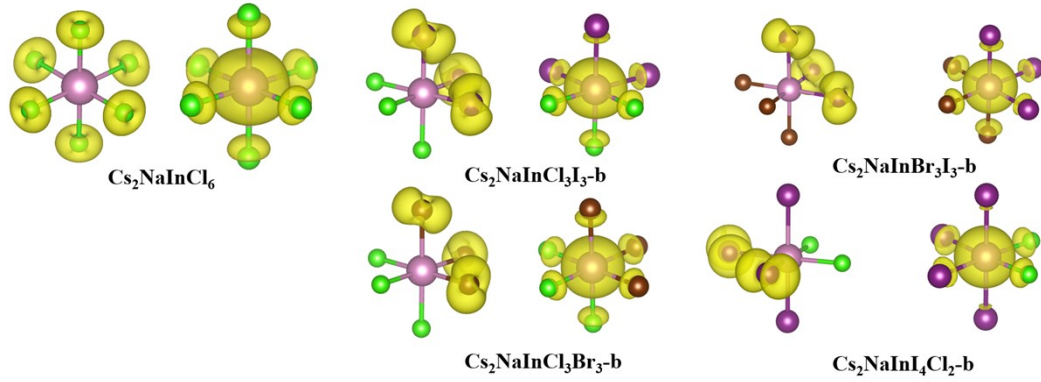

**Figure S9.** The VBM (left) and CBM (right) associated partial charge density of  $\text{Cs}_2\text{NaInCl}_6$ ,  $\text{Cs}_2\text{NaInCl}_3\text{Br}_3\text{-b}$ ,  $\text{Cs}_2\text{NaInBr}_3\text{I}_3\text{-b}$ ,  $\text{Cs}_2\text{NaInCl}_3\text{I}_3\text{-b}$ ,  $\text{Cs}_2\text{NaInI}_4\text{Cl}_2\text{-b}$ .

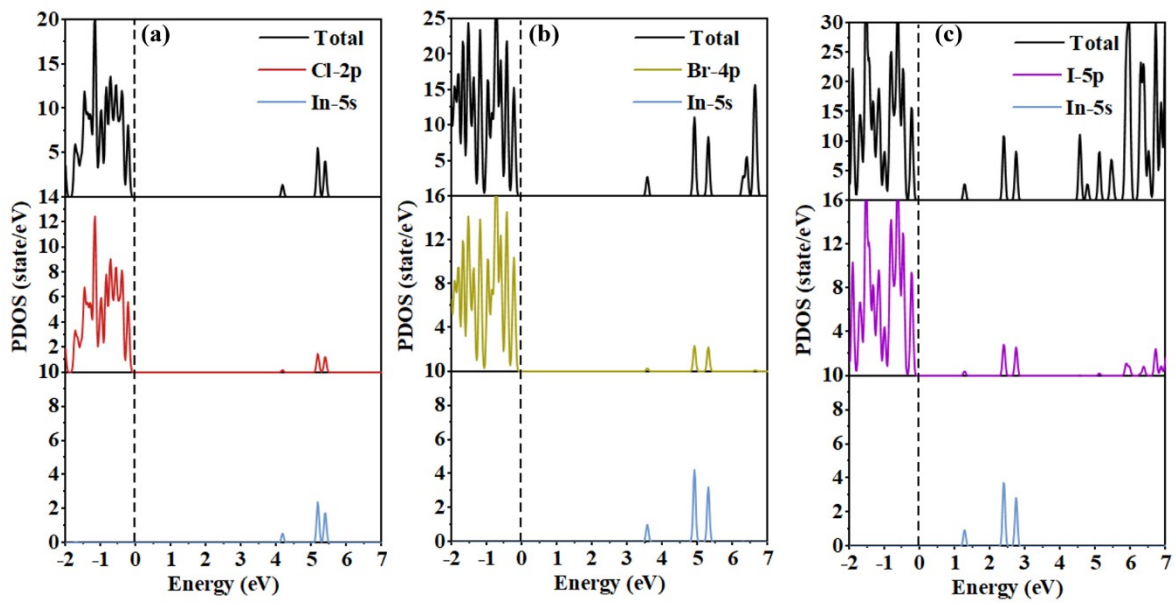

**Figure S10.** Density of state of intrinsic structures. a)  $\text{Cs}_2\text{NaInCl}_6$ , b)  $\text{Cs}_2\text{NaInBr}_6$ , c)  $\text{Cs}_2\text{NaInI}_6$

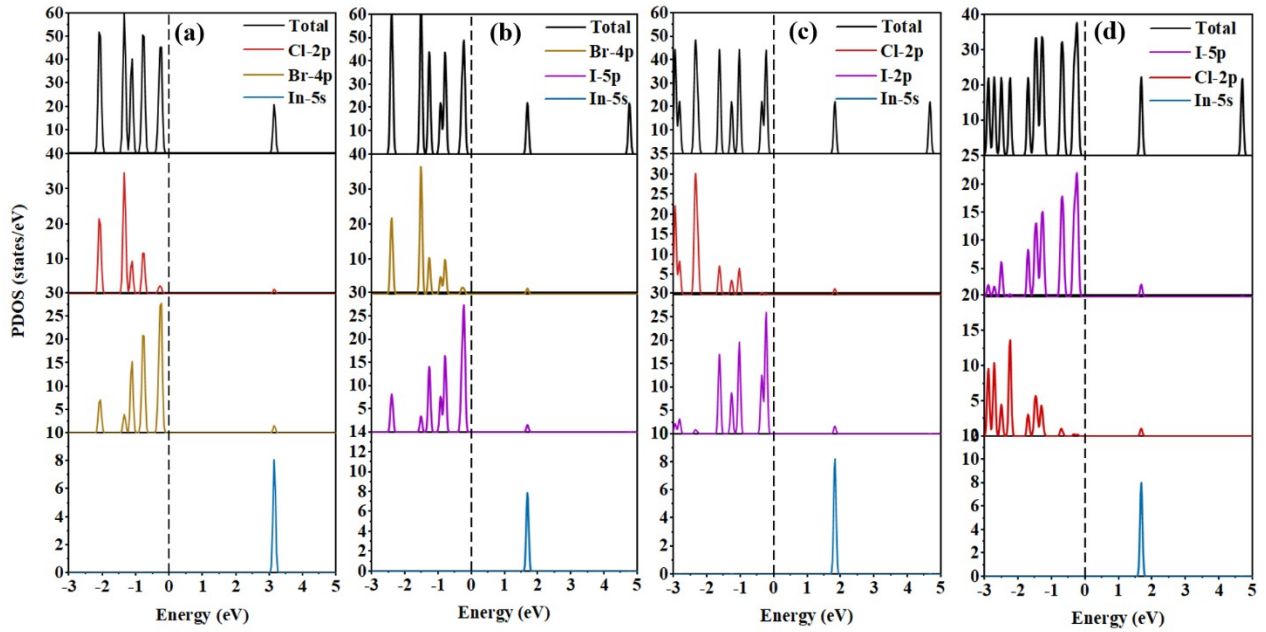

**Figure S11.** Density of state of substituted structures. a)  $\text{Cs}_2\text{NaInCl}_3\text{Br}_3\text{-b}$ . b)  $\text{Cs}_2\text{NaInBr}_3\text{I}_3\text{-b}$ . c)  $\text{Cs}_2\text{NaInCl}_3\text{I}_3\text{-b}$ . d)  $\text{Cs}_2\text{NaInI}_4\text{Cl}_2\text{-b}$ .

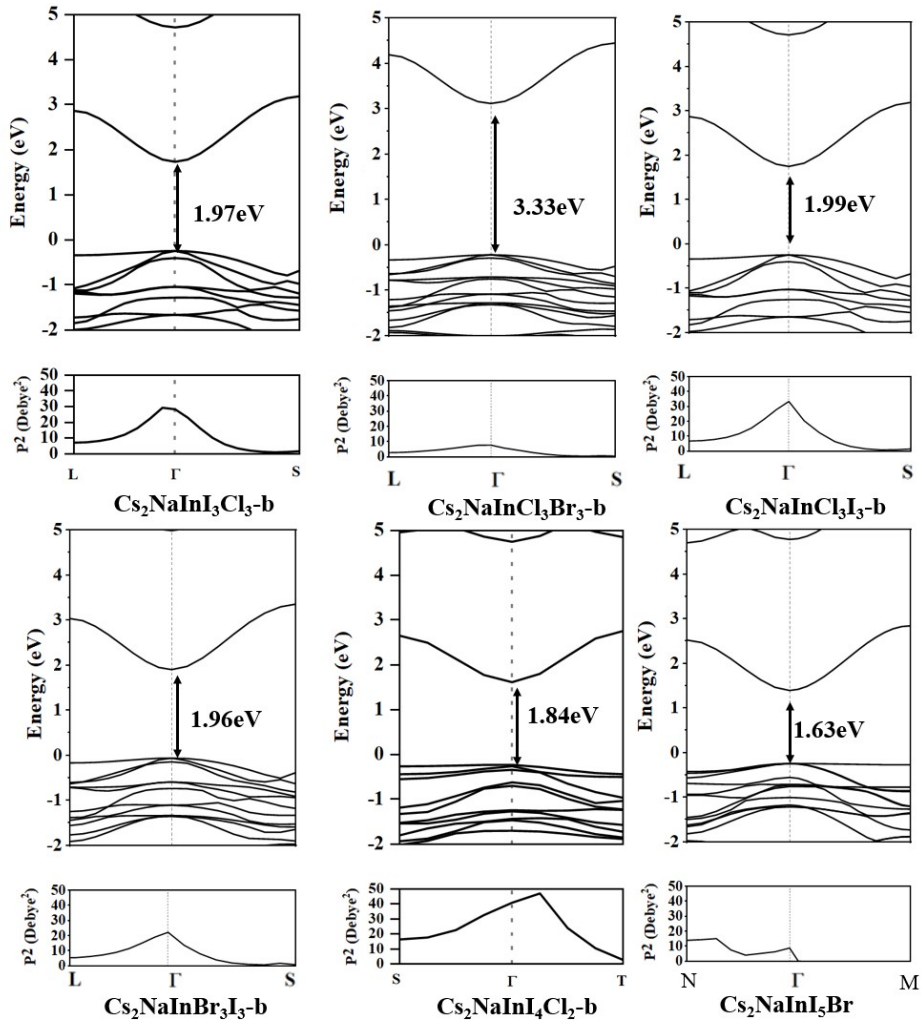

**Figure S12.** The band structures and transition dipole moments of the structures with better luminescent performance calculated by HSE06 functional

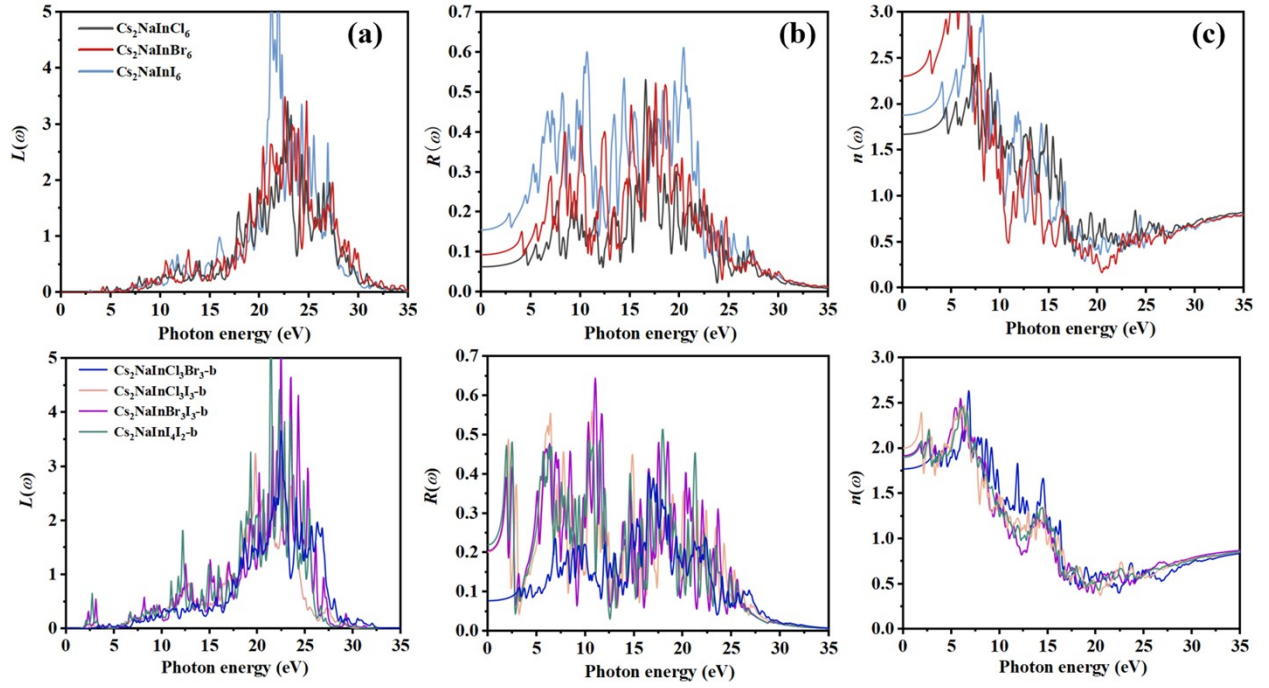

**Figure S13.** Other optical properties of intrinsic structures (upper panel) and selected substituted structures (lower panel). a) Energy loss spectrum  $L(\omega)$ . b) Reflectivity spectrum  $R(\omega)$ . c) Refractive index  $n(\omega)$ .

**Table S1** The comparison between experiment and theoretical calculations.

| Materials                           | Bandgap <sub>exp</sub> (eV) | Bandgap <sub>pbe</sub> (eV) | Bandgap <sub>HSE06</sub> (eV) |
|-------------------------------------|-----------------------------|-----------------------------|-------------------------------|
| Cs <sub>2</sub> NaInCl <sub>6</sub> | 4.13                        | 2.99                        | 4.35                          |
| Cs <sub>2</sub> NaInBr <sub>6</sub> |                             | 1.81                        | 3.78                          |
| Cs <sub>2</sub> NaInI <sub>6</sub>  |                             | 0.65                        | 1.49                          |

**Table S2** The bond length in Cs<sub>2</sub>NaInCl<sub>6</sub> and corresponding substituted structures (I substitution) supercell containing 40 atoms  $d_i$  ( $i = 1, 2, 3, 4, 5, 6$ ; Å) and corresponding distortion  $\Delta d$ 

| Materials                                             | $d_1$ | $d_2$ | $d_3$ | $d_4$ | $d_5$ | $d_6$ | $\Delta d$ |
|-------------------------------------------------------|-------|-------|-------|-------|-------|-------|------------|
| Cs <sub>2</sub> NaInCl <sub>6</sub>                   | 2.54  | 2.54  | 2.54  | 2.54  | 2.54  | 2.54  | 0.00       |
| Cs <sub>2</sub> NaInCl <sub>5</sub> I                 | 2.56  | 2.86  | 2.56  | 2.57  | 2.56  | 2.56  | 8.81E-04   |
| Cs <sub>2</sub> NaInCl <sub>4</sub> I <sub>2</sub> -a | 2.89  | 2.56  | 2.89  | 2.56  | 2.56  | 2.56  | 1.67E-03   |
| Cs <sub>2</sub> NaInCl <sub>4</sub> I <sub>2</sub> -b | 2.88  | 2.56  | 2.58  | 2.56  | 2.88  | 2.58  | 1.49E-03   |
| Cs <sub>2</sub> NaInCl <sub>3</sub> I <sub>3</sub> -a | 2.89  | 2.91  | 2.59  | 2.91  | 2.56  | 2.56  | 1.92E-03   |
| Cs <sub>2</sub> NaInCl <sub>3</sub> I <sub>3</sub> -b | 2.88  | 2.88  | 2.59  | 2.59  | 2.88  | 2.59  | 1.37E-03   |

**Table S3** The bond length in Cs<sub>2</sub>NaInCl<sub>6</sub> and corresponding substituted structures (Br substitution) supercell containing 40 atoms  $d_i$  ( $i = 1, 2, 3, 4, 5, 6$ ; Å) and corresponding distortion  $\Delta d$ 

| Materials                                              | $d_1$ | $d_2$ | $d_3$ | $d_4$ | $d_5$ | $d_6$ | $\Delta d$ |
|--------------------------------------------------------|-------|-------|-------|-------|-------|-------|------------|
| Cs <sub>2</sub> NaInCl <sub>6</sub>                    | 2.54  | 2.54  | 2.54  | 2.54  | 2.54  | 2.54  | 0.00       |
| Cs <sub>2</sub> NaInCl <sub>5</sub> Br                 | 2.56  | 2.57  | 2.56  | 2.86  | 2.56  | 2.56  | 8.81E-04   |
| Cs <sub>2</sub> NaInCl <sub>4</sub> Br <sub>2</sub> -a | 2.69  | 2.55  | 2.69  | 2.55  | 2.55  | 2.55  | 3.19E-04   |
| Cs <sub>2</sub> NaInCl <sub>4</sub> Br <sub>2</sub> -b | 2.68  | 2.55  | 2.56  | 2.55  | 2.68  | 2.56  | 2.72E-04   |
| Cs <sub>2</sub> NaInCl <sub>3</sub> Br <sub>3</sub> -a | 2.69  | 2.56  | 2.69  | 2.68  | 2.55  | 2.55  | 3.46E-04   |
| Cs <sub>2</sub> NaInCl <sub>3</sub> Br <sub>3</sub> -b | 2.68  | 2.56  | 2.56  | 2.68  | 2.68  | 2.56  | 2.73E-04   |

**Table S4** The bond length in Cs<sub>2</sub>NaInBr<sub>6</sub> and corresponding substituted structures (Cl substitution) supercell containing 40 atoms  $d_i$  ( $i = 1, 2, 3, 4, 5, 6$ ; Å) and corresponding distortion  $\Delta d$ 

| Materials                                              | $d_1$ | $d_2$ | $d_3$ | $d_4$ | $d_5$ | $d_6$ | $\Delta d$ |
|--------------------------------------------------------|-------|-------|-------|-------|-------|-------|------------|
| Cs <sub>2</sub> NaInBr <sub>6</sub>                    | 2.69  | 2.69  | 2.69  | 2.69  | 2.69  | 2.69  | 0.00       |
| Cs <sub>2</sub> NaInBr <sub>5</sub> Cl                 | 2.69  | 2.69  | 2.69  | 2.69  | 2.56  | 2.69  | 1.76E-04   |
| Cs <sub>2</sub> NaInBr <sub>4</sub> Cl <sub>2</sub> -a | 2.70  | 2.55  | 2.70  | 2.55  | 2.70  | 2.70  | 3.47E-04   |
| Cs <sub>2</sub> NaInBr <sub>4</sub> Cl <sub>2</sub> -b | 2.69  | 2.56  | 2.69  | 2.68  | 2.56  | 2.68  | 2.72E-04   |
| Cs <sub>2</sub> NaInBr <sub>3</sub> Cl <sub>3</sub> -a | 2.56  | 2.55  | 2.68  | 2.55  | 2.69  | 2.69  | 3.30E-04   |
| Cs <sub>2</sub> NaInBr <sub>3</sub> Cl <sub>3</sub> -b | 2.56  | 2.56  | 2.68  | 2.68  | 2.56  | 2.68  | 2.78E-04   |

**Table S5** The bond length in  $\text{Cs}_2\text{NaInBr}_6$  and corresponding substituted structures (I substitution) supercell containing 40 atoms  $d_i$  ( $i = 1, 2, 3, 4, 5, 6$ ; Å) and corresponding distortion  $\Delta d$

| Materials                                       | $d_1$ | $d_2$ | $d_3$ | $d_4$ | $d_5$ | $d_6$ | $\Delta d$ |
|-------------------------------------------------|-------|-------|-------|-------|-------|-------|------------|
| $\text{Cs}_2\text{NaInBr}_6$                    | 2.69  | 2.69  | 2.69  | 2.69  | 2.69  | 2.69  | 0.00       |
| $\text{Cs}_2\text{NaInBr}_5\text{I}$            | 2.70  | 2.88  | 2.70  | 2.72  | 2.70  | 2.70  | 3.00E-04   |
| $\text{Cs}_2\text{NaInBr}_4\text{I}_2\text{-a}$ | 2.70  | 2.91  | 2.70  | 2.91  | 2.70  | 2.70  | 5.91E-04   |
| $\text{Cs}_2\text{NaInBr}_4\text{I}_2\text{-b}$ | 2.70  | 2.90  | 2.70  | 2.72  | 2.90  | 2.72  | 4.83E-04   |
| $\text{Cs}_2\text{NaInBr}_3\text{I}_3\text{-a}$ | 2.90  | 2.92  | 2.72  | 2.92  | 2.70  | 2.70  | 6.53E-04   |
| $\text{Cs}_2\text{NaInBr}_3\text{I}_3\text{-b}$ | 2.90  | 2.90  | 2.72  | 2.72  | 2.90  | 2.72  | 4.70E-04   |

**Table S6** The bond length in  $\text{Cs}_2\text{NaInI}_6$  and corresponding substituted structures (Cl substitution) supercell containing 40 atoms  $d_i$  ( $i = 1, 2, 3, 4, 5, 6$ ; Å) and corresponding distortion  $\Delta d$

| Materials                                       | $d_1$ | $d_2$ | $d_3$ | $d_4$ | $d_5$ | $d_6$ | $\Delta d$ |
|-------------------------------------------------|-------|-------|-------|-------|-------|-------|------------|
| $\text{Cs}_2\text{NaInI}_6$                     | 2.92  | 2.92  | 2.92  | 2.92  | 2.92  | 2.92  | 0.00       |
| $\text{Cs}_2\text{NaInI}_5\text{Cl}$            | 2.93  | 2.88  | 2.93  | 2.58  | 2.93  | 2.93  | 9.77E-04   |
| $\text{Cs}_2\text{NaInI}_4\text{Cl}_2\text{-a}$ | 2.92  | 2.55  | 2.92  | 2.55  | 2.92  | 2.92  | 1.94E-03   |
| $\text{Cs}_2\text{NaInI}_4\text{Cl}_2\text{-b}$ | 2.94  | 2.88  | 2.59  | 2.59  | 2.88  | 2.94  | 1.47E-03   |
| $\text{Cs}_2\text{NaInI}_3\text{Cl}_3\text{-a}$ | 2.91  | 2.59  | 2.56  | 2.89  | 2.56  | 2.91  | 1.88E-03   |
| $\text{Cs}_2\text{NaInI}_3\text{Cl}_3\text{-b}$ | 2.60  | 2.88  | 2.88  | 2.60  | 2.60  | 2.88  | 1.36E-03   |

**Table S7** The bond length in  $\text{Cs}_2\text{NaInI}_6$  and corresponding substituted structures (Br substitution) supercell containing 40 atoms  $d_i$  ( $i = 1, 2, 3, 4, 5, 6$ ; Å) and corresponding distortion  $\Delta d$

| Materials                                       | $d_1$ | $d_2$ | $d_3$ | $d_4$ | $d_5$ | $d_6$ | $\Delta d$ |
|-------------------------------------------------|-------|-------|-------|-------|-------|-------|------------|
| $\text{Cs}_2\text{NaInI}_6$                     | 2.92  | 2.92  | 2.92  | 2.92  | 2.92  | 2.92  | 0.00       |
| $\text{Cs}_2\text{NaInI}_5\text{Br}$            | 2.92  | 2.72  | 2.92  | 2.90  | 2.92  | 2.92  | 3.31E-04   |
| $\text{Cs}_2\text{NaInI}_4\text{Br}_2\text{-a}$ | 2.92  | 2.70  | 2.92  | 2.70  | 2.92  | 2.92  | 6.37E-04   |
| $\text{Cs}_2\text{NaInI}_4\text{Br}_2\text{-b}$ | 2.92  | 2.73  | 2.92  | 2.90  | 2.73  | 2.90  | 4.43E-04   |
| $\text{Cs}_2\text{NaInI}_3\text{Br}_3\text{-a}$ | 2.70  | 2.73  | 2.70  | 2.90  | 2.92  | 2.92  | 6.29E-04   |
| $\text{Cs}_2\text{NaInI}_3\text{Br}_3\text{-b}$ | 2.73  | 2.73  | 2.90  | 2.90  | 2.73  | 2.90  | 4.73E-04   |

**Table S8** The bond angle in  $\text{Cs}_2\text{NaInCl}_6$  and corresponding substituted structures (Br substitution) supercell containing 40 atoms  $\theta_i(i = 1, 2, 3, 4, 5, 6,7,8; ^\circ)$  and corresponding distortion  $\Delta\theta$

| Materials                                        | $\theta_1$ | $\theta_2$ | $\theta_3$ | $\theta_4$ | $\theta_5$ | $\theta_6$ | $\theta_7$ | $\theta_8$ | $\Delta\theta$ |
|--------------------------------------------------|------------|------------|------------|------------|------------|------------|------------|------------|----------------|
| $\text{Cs}_2\text{NaInCl}_6$                     | 90.000     | 90.000     | 90.000     | 90.000     | 90.000     | 90.000     | 90.000     | 90.000     | 0.00E+00       |
| $\text{Cs}_2\text{NaInCl}_5\text{Br}$            | 90.011     | 89.988     | 89.988     | 90.011     | 90.000     | 89.988     | 90.000     | 90.011     | 5.10E-09       |
| $\text{Cs}_2\text{NaInCl}_4\text{Br}_2\text{-a}$ | 90.000     | 90.000     | 90.000     | 90.000     | 90.000     | 90.000     | 90.000     | 90.000     | 0.00E+00       |
| $\text{Cs}_2\text{NaInCl}_4\text{Br}_2\text{-b}$ | 90.067     | 90.067     | 89.9328    | 89.9328    | 90.0219    | 90.067     | 90.111     | 90.067     | 2.29E-07       |
| $\text{Cs}_2\text{NaInCl}_3\text{Br}_3\text{-a}$ | 90.001     | 89.998     | 89.998     | 90.001     | 90.000     | 89.500     | 90.000     | 90.499     | 1.92E-06       |
| $\text{Cs}_2\text{NaInCl}_3\text{Br}_3\text{-b}$ | 90.389     | 90.105     | 89.395     | 90.105     | 90.389     | 90.105     | 90.105     | 90.389     | 5.17E-06       |

**Table S9** The bond angle in  $\text{Cs}_2\text{NaInCl}_6$  and corresponding substituted structures (I substitution) supercell containing 40 atoms  $\theta_i(i = 1, 2, 3, 4, 5, 6,7,8; ^\circ)$  and corresponding distortion  $\Delta\theta$

| Materials                                       | $\theta_1$ | $\theta_2$ | $\theta_3$ | $\theta_4$ | $\theta_5$ | $\theta_6$ | $\theta_7$ | $\theta_8$ | $\Delta\theta$ |
|-------------------------------------------------|------------|------------|------------|------------|------------|------------|------------|------------|----------------|
| $\text{Cs}_2\text{NaInCl}_6$                    | 90.000     | 90.000     | 90.000     | 90.000     | 90.000     | 90.000     | 90.000     | 90.000     | 0.00           |
| $\text{Cs}_2\text{NaInCl}_5\text{I}$            | 90.012     | 90.012     | 89.989     | 89.989     | 90.000     | 90.012     | 90.000     | 89.989     | 5.10E-09       |
| $\text{Cs}_2\text{NaInCl}_4\text{I}_2\text{-a}$ | 90.000     | 90.000     | 90.000     | 90.000     | 90.000     | 90.000     | 90.000     | 90.000     | 0.00E+00       |
| $\text{Cs}_2\text{NaInCl}_4\text{I}_2\text{-b}$ | 90.121     | 90.121     | 89.879     | 89.879     | 90.001     | 90.121     | 90.071     | 90.121     | 5.60E-07       |
| $\text{Cs}_2\text{NaInCl}_3\text{I}_3\text{-a}$ | 89.904     | 90.096     | 90.096     | 89.904     | 90.879     | 90.002     | 89.121     | 90.002     | 6.26E-06       |
| $\text{Cs}_2\text{NaInCl}_3\text{I}_3\text{-b}$ | 90.778     | 90.212     | 88.782     | 90.212     | 90.778     | 90.778     | 90.212     | 90.212     | 1.86E-05       |

**Table S10** The bond angle in  $\text{Cs}_2\text{NaInBr}_6$  and corresponding substituted structures (Cl substitution) supercell containing 40 atoms  $\theta_i(i = 1, 2, 3, 4, 5, 6,7,8; ^\circ)$  and corresponding distortion  $\Delta\theta$

| Materials                                        | $\theta_1$ | $\theta_2$ | $\theta_3$ | $\theta_4$ | $\theta_5$ | $\theta_6$ | $\theta_7$ | $\theta_8$ | $\Delta\theta$ |
|--------------------------------------------------|------------|------------|------------|------------|------------|------------|------------|------------|----------------|
| $\text{Cs}_2\text{NaInBr}_6$                     | 90.000     | 90.000     | 90.000     | 90.000     | 90.000     | 90.000     | 90.000     | 90.000     | 0.00           |
| $\text{Cs}_2\text{NaInBr}_5\text{Cl}$            | 90.000     | 90.000     | 90.000     | 90.000     | 89.832     | 89.832     | 89.832     | 89.832     | 3.26E-07       |
| $\text{Cs}_2\text{NaInBr}_4\text{Cl}_2\text{-a}$ | 90.000     | 90.000     | 90.000     | 90.000     | 90.000     | 90.000     | 90.000     | 90.000     | 0.00E+00       |
| $\text{Cs}_2\text{NaInBr}_4\text{Cl}_2\text{-b}$ | 89.776     | 89.776     | 90.223     | 90.223     | 89.776     | 89.428     | 89.776     | 90.085     | 2.37E-06       |
| $\text{Cs}_2\text{NaInBr}_3\text{Cl}_3\text{-a}$ | 89.863     | 90.137     | 90.137     | 89.863     | 89.924     | 90.000     | 90.077     | 90.000     | 6.25E-07       |
| $\text{Cs}_2\text{NaInBr}_3\text{Cl}_3\text{-b}$ | 89.668     | 89.901     | 90.527     | 89.901     | 89.668     | 89.668     | 89.901     | 89.901     | 3.51E-06       |

**Table S11** The bond angle in  $\text{Cs}_2\text{NaInBr}_6$  and corresponding substituted structures (I substitution) supercell containing 40 atoms  $\theta_i (i = 1, 2, 3, 4, 5, 6, 7, 8; ^\circ)$  and corresponding distortion  $\Delta\theta$

| Materials                                       | $\theta_1$ | $\theta_2$ | $\theta_3$ | $\theta_4$ | $\theta_5$ | $\theta_6$ | $\theta_7$ | $\theta_8$ | $\Delta\theta$ |
|-------------------------------------------------|------------|------------|------------|------------|------------|------------|------------|------------|----------------|
| $\text{Cs}_2\text{NaInBr}_6$                    | 90.000     | 90.000     | 90.000     | 90.000     | 90.000     | 90.000     | 90.000     | 90.000     | 0.00           |
| $\text{Cs}_2\text{NaInBr}_5\text{I}$            | 90.626     | 90.626     | 89.373     | 89.373     | 89.993     | 90.626     | 89.993     | 89.373     | 1.51E-05       |
| $\text{Cs}_2\text{NaInBr}_4\text{I}_2\text{-a}$ | 90.000     | 90.000     | 90.000     | 90.000     | 90.000     | 90.000     | 90.000     | 90.000     | 0.00E+00       |
| $\text{Cs}_2\text{NaInBr}_4\text{I}_2\text{-b}$ | 90.433     | 90.433     | 89.561     | 89.561     | 90.433     | 90.362     | 90.433     | 90.319     | 7.59E-06       |
| $\text{Cs}_2\text{NaInBr}_3\text{I}_3\text{-a}$ | 90.468     | 89.532     | 89.532     | 90.468     | 91.173     | 89.990     | 88.827     | 89.990     | 1.73E-05       |
| $\text{Cs}_2\text{NaInBr}_3\text{I}_3\text{-b}$ | 90.756     | 90.092     | 89.047     | 90.092     | 90.756     | 90.756     | 90.092     | 90.092     | 1.31E-05       |

**Table S12** The bond angle in  $\text{Cs}_2\text{NaInI}_6$  and corresponding substituted structures (Cl substitution) supercell containing 40 atoms  $\theta_i (i = 1, 2, 3, 4, 5, 6, 7, 8; ^\circ)$  and corresponding distortion  $\Delta\theta$

| Materials                                       | $\theta_1$ | $\theta_2$ | $\theta_3$ | $\theta_4$ | $\theta_5$ | $\theta_6$ | $\theta_7$ | $\theta_8$ | $\Delta\theta$ |
|-------------------------------------------------|------------|------------|------------|------------|------------|------------|------------|------------|----------------|
| $\text{Cs}_2\text{NaInI}_6$                     | 90.000     | 90.000     | 90.000     | 90.000     | 90.000     | 90.000     | 90.000     | 90.000     | 0.00           |
| $\text{Cs}_2\text{NaInI}_5\text{Cl}$            | 88.371     | 91.629     | 91.629     | 88.371     | 88.371     | 89.954     | 91.629     | 89.954     | 1.03E-04       |
| $\text{Cs}_2\text{NaInI}_4\text{Cl}_2\text{-a}$ | 90.000     | 90.000     | 90.000     | 90.000     | 90.000     | 90.000     | 90.000     | 90.000     | 0.00E+00       |
| $\text{Cs}_2\text{NaInI}_4\text{Cl}_2\text{-b}$ | 90.058     | 90.058     | 89.946     | 89.946     | 90.058     | 85.624     | 90.058     | 90.118     | 1.50E-05       |
| $\text{Cs}_2\text{NaInI}_3\text{Cl}_3\text{-a}$ | 89.045     | 90.955     | 90.955     | 89.045     | 90.089     | 90.002     | 89.911     | 90.002     | 2.82E-05       |
| $\text{Cs}_2\text{NaInI}_3\text{Cl}_3\text{-b}$ | 90.801     | 90.223     | 88.735     | 90.223     | 90.801     | 90.801     | 90.223     | 90.223     | 2.00E-05       |

**Table S13** The bond angle in  $\text{Cs}_2\text{NaInI}_6$  and corresponding substituted structures (Br substitution) supercell containing 40 atoms  $\theta_i (i = 1, 2, 3, 4, 5, 6, 7, 8; ^\circ)$  and corresponding distortion  $\Delta\theta$

| Materials                                       | $\theta_1$ | $\theta_2$ | $\theta_3$ | $\theta_4$ | $\theta_5$ | $\theta_6$ | $\theta_7$ | $\theta_8$ | $\Delta\theta$ |
|-------------------------------------------------|------------|------------|------------|------------|------------|------------|------------|------------|----------------|
| $\text{Cs}_2\text{NaInI}_6$                     | 90.000     | 90.000     | 90.000     | 90.000     | 90.000     | 90.000     | 90.000     | 90.000     | 0.00           |
| $\text{Cs}_2\text{NaInI}_5\text{Br}$            | 89.171     | 89.171     | 90.829     | 90.829     | 89.988     | 89.171     | 89.988     | 90.829     | 2.65E-05       |
| $\text{Cs}_2\text{NaInI}_4\text{Br}_2\text{-a}$ | 90.000     | 90.000     | 90.000     | 90.000     | 90.000     | 90.000     | 90.000     | 90.000     | 0.00E+00       |
| $\text{Cs}_2\text{NaInI}_4\text{Br}_2\text{-b}$ | 89.597     | 89.597     | 90.389     | 90.389     | 89.597     | 87.659     | 89.597     | 90.371     | 1.26E-05       |
| $\text{Cs}_2\text{NaInI}_3\text{Br}_3\text{-a}$ | 88.815     | 88.815     | 91.185     | 91.185     | 89.995     | 89.751     | 89.995     | 90.249     | 4.38E-05       |
| $\text{Cs}_2\text{NaInI}_3\text{Br}_3\text{-b}$ | 89.056     | 90.115     | 90.704     | 90.115     | 89.056     | 89.056     | 90.115     | 90.115     | 1.39E-05       |
